# Supplementary material for: Perseverative Cognition and Snack Choice: An Online Pilot Investigation
Source: MDPI journal article supplement (doi:10.3390/bs11030033), 2021-03-11
Supplement: s1 [file s1]

**Table S1.** The model summary of the logistic regression predicting snack choice for the chocolate selection task. Primary predictors included were condition (availability ratio of high & low calorie snacks), state rumination and trait preservative cognition with gender and self-reported hunger incorporated entered as covariates.

|                                                          | Wald         | <i>p</i> -Value | Odds Ratio | 95% Confidence Interval |              |
|----------------------------------------------------------|--------------|-----------------|------------|-------------------------|--------------|
|                                                          |              |                 |            | <i>Lower</i>            | <i>Upper</i> |
| <b>Male (Ref: Female)</b>                                | <b>3.992</b> | <b>0.046</b>    | 1.85       | 1.01                    | 3.37         |
| <b>Hunger</b>                                            | 2.805        | 0.094           | 1.69       | 1.05                    | 2.70         |
| <b>Uneven Condition (Ref: Even)</b>                      | 9.436        | 0.002           | 2.50       | 1.39                    | 4.48         |
| <b>State Rumination (BSRI score)</b>                     | 1.809        | 0.179           | 1.63       | 0.80                    | 3.34         |
| <b>Trait Preservative cognition (PTQ score)</b>          | 1.136        | 0.286           | 1.02       | 0.99                    | 1.04         |
| <b>Constant</b>                                          | 4.088        | 0.043           | 5.43       |                         |              |
| Nagelkerke R Square = 0.129                              |              |                 |            |                         |              |
| Hosmer and Lemeshow Test: $\chi^2 = 6.065$ , $p = 0.640$ |              |                 |            |                         |              |

**Table S2.** The model summary of the logistic regression predicting snack choice for the crisp selection task. Primary predictors included were condition (availability ratio of high & low calorie snacks), state rumination and trait preservative cognition with gender and self-reported hunger incorporated entered as covariates.

|                                                          | Wald         | <i>p</i> -Value | Odds Ratio | 95% Confidence Interval |              |
|----------------------------------------------------------|--------------|-----------------|------------|-------------------------|--------------|
|                                                          |              |                 |            | <i>Lower</i>            | <i>Upper</i> |
| <b>Male (Ref: Female)</b>                                | <b>5.995</b> | <b>0.014</b>    | 2.23       | 1.17                    | 4.24         |
| <b>Hunger</b>                                            | 4.829        | 0.028           | 1.69       | 0.91                    | 3.57         |
| <b>Uneven Condition (Ref: Even)</b>                      | 4.790        | 0.029           | 1.93       | 1.06                    | 2.70         |
| <b>State Rumination (BSRI score)</b>                     | 2.834        | 0.092           | 1.80       | 1.07                    | 3.48         |
| <b>Trait Preservative cognition (PTQ score)</b>          | 0.059        | 0.808           | 1.00       | 0.98                    | 1.03         |
| <b>Constant</b>                                          | 2.601        | 0.107           | 3.65       |                         |              |
| Nagelkerke R Square = 0.147                              |              |                 |            |                         |              |
| Hosmer and Lemeshow Test: $\chi^2 = 3.539$ , $p = 0.896$ |              |                 |            |                         |              |
